# Supplementary material for: Synthesis of single crystalline CdS nanocombs and their application in photo-sensitive field emission switches
Source: Royal Society of Chemistry journal article supplement (doi:10.1039/c0nr00659a), 2010-12-21
Supplement: c0nr00659a.pdf [file c0nr00659a.pdf]

Supplementary Information

## Synthesis of Single Crystalline CdS Nanocombs and its Application as Photo-Sensitive Field Emission Switch

Padmakar G. Chavan<sup>a</sup> Satish S. Badadhe<sup>b</sup>, Imtiaz S. Mulla<sup>b</sup>, Mahendra A. More<sup>a</sup>  
and Dilip S. Joag<sup>a\*</sup>

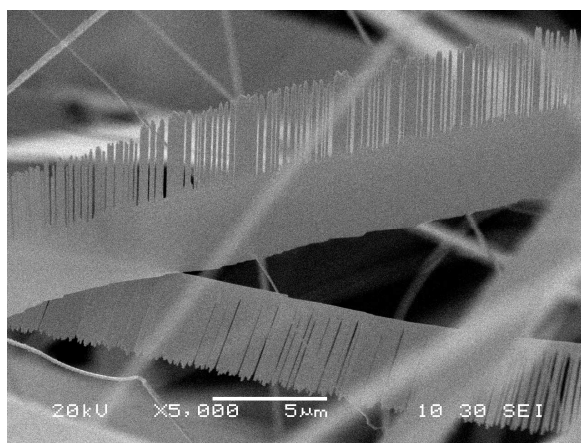

CdS nanocombs shows highly asymmetric growth of the oriented spikes depicting the nanocomb-like structure
